# Supplementary material for: A CACTA-like transposon in the Anthocyanidin synthase 1 (Ans-1) gene is responsible for apricot fruit colour in the raspberry (Rubus idaeus) cultivar ‘Varnes’
Source: PubMed Central journal article supplement (PMC11790086; doi:10.1371/journal.pone.0318692), 2025-02-03

Raw gel image used for Fig5

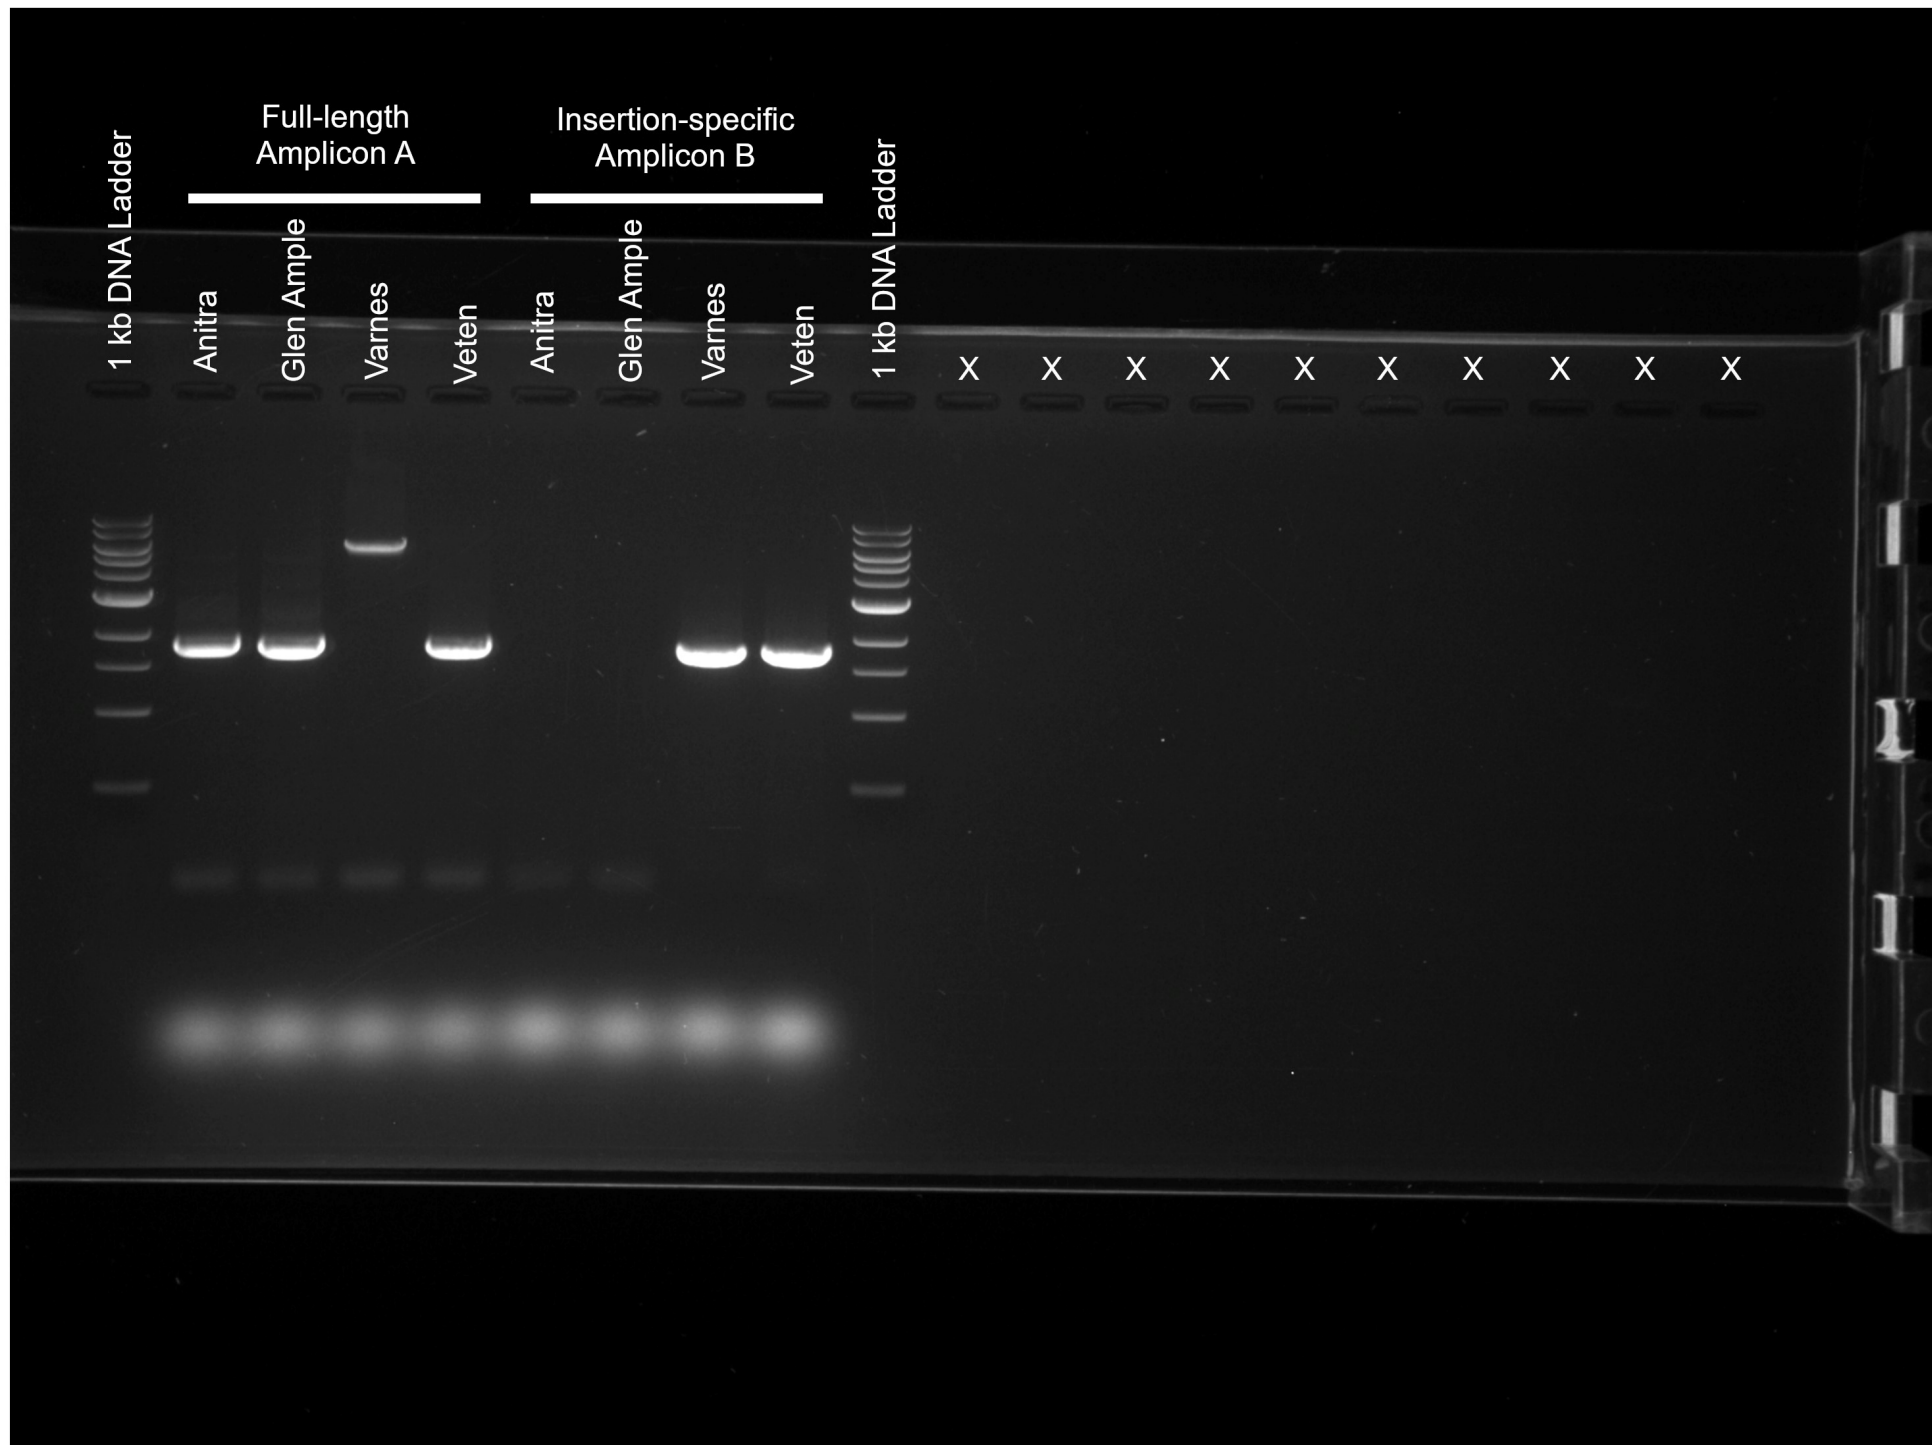

Supplement: pone.0318692.s001.pdf [file pone.0318692.s001.pdf]
